# Supplementary material for: MT2 receptor mediates melatonin-induced thermogenic program in human myoblasts: insights for circadian syndrome and diabesity treatment
Source: Front Pharmacol. 2025 Jul 8;16:1633326. doi: 10.3389/fphar.2025.1633326 (PMC12279780; doi:10.3389/fphar.2025.1633326)
Supplement: Supplementary file 1 [file Table2.xlsx]

## Sheet: Hoja1
Genes from Cluster "Disease of metabolism"	Genes from Cluster "Glucose metabolism disease"	Genes from Cluster "Diabetes mellitus"	Genes from Cluster "Obesity"	Genes from Cluster "Sleep disorders"	Genes from Cluster "Type 2 diabetes mellitus"
A2M	ABCC8	ABCC8	ADCY3	ALPK1	ADIPOQ
ABCA1	ACE	ACE	ADIPOQ	BTBD9	AKT1
ABCA7	ADIPOQ	ADIPOQ	ADRB3	CHKB	ALB
ABCB1	ADRB3	ADRB3	AGRP	CLOCK	APCS
ABCB11	AGPAT2	AGPAT2	ALMS1	CPT1B	APOE
ABCC2	AKT1	AKT1	ARL6	CRP	CRP
ABCC3	AKT2	AKT2	BBS1	CRY1	DPP4
ABCC8	ALB	ALB	BBS10	CSNK1D	GCG
ABCG1	ALMS1	ALMS1	BBS2	CSNK1E	GLP1R
ABCG2	ANGPTL8	ANGPTL8	BBS4	GBA	HSPG2
ACADM	APCS	APCS	BBS5	HCRT	IAPP
ACADS	APOE	APOE	BBS7	HCRTR1	IGF1
ACADSB	APPL1	APPL1	BBS9	HCRTR2	IL1B
ACADVL	BCAR1	BCAR1	CARTPT	HLA-DQA1	IL6
ACAT1	BLK	BLK	CNR1	HLA-DQB1	INS
ACAT2	BSCL2	BSCL2	CPE	HLA-DRB1	IRS1
ACE	CAPN10	CAPN10	ENPP1	INS	LEP
ACOX1	CAV1	CAV1	FTO	LEP	PPARA
ACTA2	CCR5	CCR5	GHRL	LRRK2	PPARG
ACTG1	CD38	CD38	GNAS	P2RY11	PPARGC1A
ADCY3	CDKAL1	CDKAL1	IL6	PER2	RETN
ADIPOQ	CEL	CEL	INPP5E	PER3	SLC2A4
ADRB3	CISD2	CISD2	INS	PHOX2B	SLC5A2
AGA	CLEC16A	CLEC16A	KIDINS220	REN	TNF
AGPAT2	CLPS	CLPS	LEP	SLC6A3
AGRN	CRP	CRP	LEPR	SNCA
AGRP	CTLA4	CTLA4	LIPE	TNF
AHSG	DPP4	DPP4	MAGEL2	TNFRSF1B
AIRE	EIF2AK3	EIF2AK3	MC4R
AKT1	ENPP1	ENPP1	MKKS
AKT2	FOXP3	FOXP3	MRAP2
ALAS1	GAD2	GAD2	NR0B2
ALB	GCG	GCG	NTRK2
ALMS1	GCGR	GCGR	PCSK1
AMPD1	GCK	GCK	PNPLA3
ANGPTL3	GLIS3	GLIS3	POMC
ANGPTL8	GLP1R	GLP1R	PPARG
APCS	GLUD1	GSK3B	RETN
APOA1	GSK3B	GYS1	SDCCAG8
APOA2	GYS1	HBA1	SLC6A14
APOA4	HADH	HLA-DQA1	TRIM32
APOA5	HBA1	HLA-DQB1	TTC8
APOB	HLA-DQA1	HLA-DRB1	TUB
APOC2	HLA-DQB1	HNF1A	UCP1
APOC3	HLA-DRB1	HNF1B	UCP3
APOE	HNF1A	HNF4A
APP	HNF1B	HSPG2
APPL1	HNF4A	IAPP
ARG1	HSPG2	IFIH1
ARL6	IAPP	IGF1
ASL	IFIH1	IGF2BP2
ASS1	IGF1	IL1B
ATP6AP2	IGF2BP2	IL2RA
AZGP1	IL1B	IL6
BBS1	IL2RA	INPPL1
BBS10	IL6	INS
BBS2	INPPL1	INSR
BBS4	INS	IRS1
BBS5	INSR	ITPR3
BBS7	IRS1	KCNJ11
BBS9	ITPR3	KCNQ1
BCAR1	KCNJ11	KLF11
BGLAP	KCNQ1	LEP
BHMT	KLF11	LIPE
BLK	LEP	MCF2L2
BSCL2	LIPE	MIA3
C2orf16	MCF2L2	MT-ND1
C3	MIA3	MTNR1B
CAD	MT-ND1	NEUROD1
CAPN10	MTNR1B	OAS1
CARTPT	NEUROD1	PAX4
CASR	OAS1	PDX1
CAT	PAX4	PLAGL1
CAV1	PDX1	PMP22
CBS	PLAGL1	PPARA
CBX5	PMP22	PPARG
CCR5	POMC	PPARGC1A
CD38	PPARA	PPP1R3A
CDKAL1	PPARG	PTF1A
CEL	PPARGC1A	PTPN22
CETP	PPP1R3A	PTPRN
CHDH	PTF1A	PTPRN2
CISD2	PTPN22	RETN
CLEC16A	PTPRN	SEL1L
CLN3	PTPRN2	SH2B3
CLPS	RETN	SLC16A11
CLU	SEL1L	SLC19A2
CNDP1	SH2B3	SLC22A3
CNNM2	SHBG	SLC2A4
CNR1	SLC16A1	SLC30A10
COG2	SLC16A11	SLC30A8
COL6A1	SLC19A2	SLC5A2
COX8A	SLC22A3	STAT3
CP	SLC2A2	SUMO4
CPE	SLC2A4	TCF7L2
CPS1	SLC30A10	TMTC1
CPT1A	SLC30A8	TNF
CPT2	SLC5A2	TRMT10A
CRP	STAT3	UCP1
CST3	SUMO4	UCP3
CTH	TCF7L2	WFS1
CTLA4	TMTC1	ZFP57
CYP11A1	TNF
CYP11B1	TRMT10A
CYP17A1	UCP1
CYP21A2	UCP2
CYP24A1	UCP3
CYP27A1	WFS1
CYP2A6	ZFP57
CYP2C9
CYP4F2
CYP7A1
CYP7B1
DARS2
DBH
DCD
DHCR7
DLD
DNAJC19
DPP4
DRD2
EIF2AK3
ENPP1
EPO
F2
F9
FARS2
FGA
FGF21
FGF23
FH
FMO3
FN1
FOXP3
FTO
G6PC
G6PC2
G6PD
GAD2
GALNT2
GAST
GBA
GBE1
GCG
GCGR
GCK
GCKR
GGT1
GHRL
GLA
GLIS3
GLP1R
GLUD1
GNAS
GNMT
GNRH1
GPT
GPX3
GRN
GSK3B
GSS
GTPBP3
GYG2
GYS1
GYS2
H6PD
HADH
HADHA
HAL
HBA1
HBB
HCAR2
HFE
HLA-DQA1
HLA-DQB1
HLA-DRB1
HNF1A
HNF1B
HNF4A
HSD11B1
HSD11B2
HSD3B2
HSPG2
IAPP
IARS2
IFIH1
IGF1
IGF2BP2
IL1B
IL2RA
IL6
INPP5E
INPPL1
INS
INSR
IRS1
ITPR3
KCNJ1
KCNJ11
KCNJ2
KCNQ1
KIDINS220
KL
KLF11
LAMA1
LCAT
LCT
LDHA
LDLR
LDLRAP1
LECT2
LEP
LEPR
LIPA
LIPC
LIPE
LIPG
LPL
MAGEL2
MAOA
MAT1A
MBOAT7
MC4R
MCCC1
MCF2L2
MCOLN2
MCOLN3
MEFV
MFGE8
MGP
MIA3
MKKS
MMAB
MMACHC
MMUT
MRAP2
MRPS22
MSMO1
MT-ATP6
MT-CYB
MTHFR
MTIF2
MTIF3
MT-ND1
MT-ND2
MT-ND3
MT-ND4
MT-ND5
MTNR1B
MTO1
MTR
MTRR
MTTP
MVK
MYD88
NDUFA4
NDUFB3
NEUROD1
NLRP3
NPC1
NPPA
NQO1
NR0B2
NR1H4
NR3C2
NTRK2
OAS1
OGA
OPLAH
PAH
PAX4
PCBD1
PCSK1
PCSK9
PDHA1
PDX1
PEMT
PEPD
PEX2
PFKP
PGM1
PHGDH
PHKA2
PIK3C2A
PLAGL1
PMP22
PNPLA1
PNPLA2
PNPLA3
POLG
POLG2
POMC
POR
PPARA
PPARG
PPARGC1A
PPM1K
PPP1R3A
PRKAG2
PRL
PRLR
PRNP
PSEN1
PSEN2
PSPH
PTF1A
PTH
PTHLH
PTPN22
PTPRN
PTPRN2
PYGB
PYGM
QRSL1
REN
RETN
SAA1
SAA4
SARDH
SC5D
SDC1
SDC2
SDC3
SDCCAG8
SEL1L
SELENOP
SELENOS
SERPINA1
SERPINA3
SH2B3
SHBG
SLC12A3
SLC16A1
SLC16A11
SLC17A1
SLC17A5
SLC19A2
SLC19A3
SLC22A11
SLC22A12
SLC22A3
SLC22A5
SLC25A12
SLC25A20
SLC2A2
SLC2A4
SLC2A9
SLC30A10
SLC30A8
SLC39A14
SLC39A8
SLC40A1
SLC5A2
SLC6A14
SMPD1
SNCA
SORL1
SREBF1
STAT3
SULT4A1
SUMO4
SUV39H1
TARS2
TCF7L2
TCN1
TCN2
TFRC
TG
TM6SF2
TMPRSS6
TMTC1
TNF
TNFRSF1A
TNFSF11
TPMT
TRIB1
TRIM32
TRMT10A
TRMU
TRPM6
TST
TTC8
TUB
TUFM
UCP1
UCP2
UCP3
UGCG
UGT1A1
UGT1A6
UQCRC2
USF1
VARS2
VKORC1
WDR60
WFS1
ZFP57
