# Supplementary material for: MT2 receptor mediates melatonin-induced thermogenic program in human myoblasts: insights for circadian syndrome and diabesity treatment
Source: Front Pharmacol. 2025 Jul 8;16:1633326. doi: 10.3389/fphar.2025.1633326 (PMC12279780; doi:10.3389/fphar.2025.1633326)
Supplement: Supplementary file 2 [file Table1.xlsx]

## Sheet: Sheet1
Genes	Associated Phenotype
A2BP1	Obesity
A2M	Diabetes
A4GALT	Obesity
AACS	Obesity
AANAT	Sleep Disorders
AAT2	Diabetes
AATF	Obesity
ABAT	Sleep Disorders
ABCA1	Obesity
	Diabetes
ABCA3	Diabetes
ABCA4	Diabetes
ABCA7	Obesity
ABCB1	Obesity
	Diabetes
	Sleep Disorders
ABCB11	Obesity
ABCB5	Obesity
ABCB6	Obesity
	Diabetes
ABCC1	Diabetes
ABCC2	Obesity
ABCC3	Obesity
ABCC4	Diabetes
ABCC8	Obesity
	Diabetes
ABCC9	Obesity
	Sleep Disorders
ABCG1	Obesity
	Diabetes
ABCG2	Obesity
	Diabetes
ABCG4	Diabetes
ABCG5	Obesity
	Diabetes
ABCG8	Obesity
	Diabetes
ABI2	Obesity
	Diabetes
ABO	Obesity
	Diabetes
	Sleep Disorders
ABR	Obesity
ACAA2	Obesity
ACACA	Obesity
ACACB	Obesity
	Diabetes
ACADM	Obesity
ACADS	Obesity
ACADSB	Obesity
	Diabetes
ACADVL	Obesity
ACAN	Obesity
ACAT1	Obesity
ACAT2	Obesity
ACCN1	Sleep Disorders
ACD	Diabetes
ACE	Obesity
	Diabetes
	Sleep Disorders
ACE2	Obesity
	Diabetes
ACHE	Obesity
ACLY	Obesity
ACOX1	Obesity
ACOX3	Sleep Disorders
ACOXL	Obesity
ACP1	Obesity
	Diabetes
ACP2	Diabetes
ACR	Diabetes
ACSL1	Obesity
	Diabetes
ACSL4	Obesity
ACSL5	Obesity
ACSM1	Obesity
ACSM2B	Obesity
ACSM3	Obesity
	Diabetes
ACSS2	Diabetes
ACTA1	Diabetes
ACTA2	Diabetes
ACTG1	Obesity
ACTL9	Obesity
ACTN2	Obesity
ACTN3	Obesity
ACTN4	Obesity
ACTR2	Obesity
ACTR3C	Obesity
ACVR1	Sleep Disorders
ACYP2	Diabetes
ADA	Obesity
	Diabetes
	Sleep Disorders
ADAD1	Diabetes
ADAM10	Sleep Disorders
ADAM11	Obesity
ADAM17	Obesity
	Diabetes
ADAM23	Obesity
ADAMDEC1	Diabetes
ADAMTS1	Obesity
ADAMTS13	Obesity
	Diabetes
ADAMTS3	Obesity
ADAMTS9	Obesity
	Diabetes
ADAMTS9-AS2	Obesity
ADAMTSL3	Obesity
ADARB1	Obesity
ADARB2	Obesity
ADAT1	Diabetes
ADCY3	Obesity
ADCY5	Obesity
	Diabetes
ADCY8	Sleep Disorders
ADCY9	Obesity
ADCYAP1	Obesity
ADCYAP1R1	Diabetes
ADD1	Obesity
	Diabetes
ADH1B	Obesity
	Diabetes
	Sleep Disorders
ADH1C	Diabetes
ADH5	Sleep Disorders
ADIG	Obesity
ADIPOQ	Obesity
	Diabetes
	Sleep Disorders
ADIPOR1	Obesity
	Diabetes
ADIPOR2	Obesity
	Diabetes
ADK	Obesity
	Sleep Disorders
ADM	Obesity
	Diabetes
ADNP	Diabetes
ADORA1	Obesity
	Sleep Disorders
ADORA2A	Obesity
	Diabetes
	Sleep Disorders
ADORA2B	Diabetes
ADORA3	Obesity
	Diabetes
ADPN	Obesity
ADRA1A	Obesity
ADRA1B	Obesity
	Sleep Disorders
ADRA2A	Obesity
	Diabetes
	Sleep Disorders
ADRA2B	Obesity
	Diabetes
ADRA2C	Diabetes
ADRB1	Obesity
	Diabetes
	Sleep Disorders
ADRB2	Obesity
	Diabetes
	Sleep Disorders
ADRB3	Obesity
	Diabetes
	Sleep Disorders
AFF1	Diabetes
AFP	Obesity
	Diabetes
AGA	Obesity
AGBL2	Obesity
AGER	Obesity
	Diabetes
AGMO	Obesity
	Diabetes
AGPAT1	Obesity
AGPAT2	Obesity
AGPAT6	Obesity
AGRN	Obesity
AGRP	Obesity
	Diabetes
AGT	Obesity
	Diabetes
	Sleep Disorders
AGTPBP1	Obesity
AGTR1	Obesity
	Diabetes
AGTR2	Obesity
	Diabetes
AGXT2	Diabetes
AHCY	Sleep Disorders
AHI1	Obesity
	Diabetes
AHR	Obesity
	Sleep Disorders
AHRR	Sleep Disorders
AHSG	Obesity
	Diabetes
AICDA	Diabetes
AIF1	Obesity
AIRE	Diabetes
AKAP1	Sleep Disorders
AKAP10	Diabetes
AKAP6	Obesity
	Sleep Disorders
AKR1A1	Diabetes
AKR1B1	Obesity
	Diabetes
AKR1B10	Diabetes
AKR1C1	Obesity
AKR1C2	Obesity
AKR1C4	Obesity
AKT1	Obesity
	Diabetes
AKT2	Obesity
	Diabetes
AKT3	Obesity
AKTIP	Obesity
ALAS1	Obesity
ALB	Obesity
	Diabetes
ALDH1A2	Obesity
	Diabetes
ALDH1B1	Obesity
	Diabetes
ALDH2	Obesity
	Diabetes
ALDH3A2	Obesity
	Sleep Disorders
ALDH9A1	Sleep Disorders
ALG14	Diabetes
ALMS1	Obesity
	Diabetes
ALOX12	Obesity
	Diabetes
ALOX12B	Obesity
ALOX15	Obesity
	Diabetes
ALOX15B	Sleep Disorders
ALOX5	Obesity
	Diabetes
	Sleep Disorders
ALOX5AP	Obesity
	Diabetes
ALPK1	Diabetes
ALPL	Obesity
ALPP	Obesity
	Diabetes
ALX4	Obesity
	Diabetes
AMAC1L2	Obesity
AMD1	Obesity
AMPD1	Obesity
	Diabetes
AMPD2	Diabetes
AMY1A	Obesity
AMY2A	Obesity
AMY2B	Obesity
ANG	Diabetes
ANGPT1	Obesity
	Diabetes
ANGPT2	Obesity
	Diabetes
ANGPTL3	Obesity
	Diabetes
ANGPTL4	Obesity
	Diabetes
ANK1	Diabetes
ANKH	Obesity
	Diabetes
ANKK1	Obesity
	Sleep Disorders
ANKRD33	Obesity
ANKRD55	Diabetes
ANP32A	Obesity
ANXA11	Diabetes
ANXA5	Obesity
	Diabetes
ANXA9	Obesity
AP1M2	Diabetes
AP2A2	Diabetes
AP2B1	Obesity
	Diabetes
AP3S2	Obesity
	Diabetes
APBA3	Sleep Disorders
APBB2	Sleep Disorders
APCS	Obesity
	Diabetes
APEX1	Obesity
	Diabetes
APLN	Obesity
	Diabetes
APLNR	Obesity
	Diabetes
APOA1	Obesity
	Diabetes
APOA2	Obesity
	Diabetes
APOA4	Obesity
	Diabetes
APOA5	Obesity
	Diabetes
APOB	Obesity
	Diabetes
APOBR	Obesity
APOC1	Obesity
	Diabetes
APOC2	Obesity
	Diabetes
APOC3	Obesity
	Diabetes
APOC4	Obesity
	Diabetes
APOD	Diabetes
APOE	Obesity
	Diabetes
	Sleep Disorders
APOF	Diabetes
APOH	Obesity
APOL1	Obesity
	Diabetes
APOL3	Obesity
APOM	Obesity
	Diabetes
APP	Obesity
	Diabetes
	Sleep Disorders
APPL	Diabetes
APPL1	Obesity
	Diabetes
APPL2	Obesity
	Diabetes
APTX	Obesity
AQP1	Diabetes
AQP11	Diabetes
AQP2	Diabetes
AQP7	Obesity
AR	Obesity
	Diabetes
ARAP1	Obesity
	Diabetes
ARFRP1	Obesity
ARG1	Obesity
ARGLU1	Diabetes
ARHGAP11A	Obesity
ARHGAP22	Diabetes
ARHGEF11	Obesity
	Diabetes
ARHGEF12	Obesity
	Diabetes
ARID3B	Obesity
ARID4B	Obesity
ARID5B	Obesity
	Diabetes
ARL15	Obesity
	Diabetes
ARL4D	Diabetes
ARL6	Obesity
ARL6IP1	Obesity
ARMS2	Diabetes
ARNT	Diabetes
	Sleep Disorders
ARNT2	Obesity
ARNTL	Obesity
	Diabetes
	Sleep Disorders
ARNTL2	Obesity
	Sleep Disorders
ARRB1	Obesity
ASB13	Sleep Disorders
ASCC1	Obesity
ASCL1	Obesity
	Diabetes
	Sleep Disorders
ASL	Obesity
ASMT	Sleep Disorders
ASNS	Obesity
ASPM	Obesity
ASPN	Obesity
ASPSCR1	Diabetes
ASS1	Obesity
ASTN2	Obesity
ASZ1	Obesity
ATF3	Obesity
ATF6	Obesity
	Diabetes
ATG16L1	Obesity
	Diabetes
ATG9B	Diabetes
ATM	Diabetes
	Sleep Disorders
ATN1	Obesity
	Diabetes
ATP10D	Diabetes
ATP1A1	Diabetes
ATP1A4	Obesity
ATP2A1	Obesity
ATP2A3	Obesity
ATP2B1	Obesity
ATP5B	Diabetes
ATP5E	Diabetes
ATP5G2	Obesity
ATP5SL	Obesity
ATP6	Obesity
	Diabetes
ATP6AP2	Obesity
ATP6V0A2	Obesity
ATP8A1	Obesity
ATXN1	Obesity
	Sleep Disorders
ATXN2	Obesity
	Diabetes
	Sleep Disorders
ATXN2L	Obesity
ATXN3	Obesity
	Sleep Disorders
ATXN7	Obesity
	Sleep Disorders
AURKA	Diabetes
AVP	Obesity
	Diabetes
AVPR1A	Obesity
AVPR1B	Obesity
	Diabetes
AXL	Obesity
AZGP1	Obesity
AZIN1	Diabetes
B3GNT2	Obesity
B3GNT3	Diabetes
B4GALNT1	Diabetes
BAAT	Sleep Disorders
BACE1	Obesity
	Diabetes
BACE2	Diabetes
BACH2	Obesity
	Diabetes
BAG1	Sleep Disorders
BAI2	Sleep Disorders
BAI3	Obesity
	Sleep Disorders
BAMBI	Obesity
BAS	Obesity
BAT2	Obesity
BAZ1B	Diabetes
BBS1	Obesity
BBS10	Obesity
BBS2	Obesity
BBS4	Obesity
BBS5	Obesity
BBS7	Obesity
BBS9	Obesity
	Diabetes
BCAP29	Sleep Disorders
BCAR1	Diabetes
BCAT1	Obesity
	Diabetes
BCAT2	Obesity
BCDIN3D	Obesity
BCHE	Obesity
	Diabetes
	Sleep Disorders
BCL11A	Obesity
	Diabetes
BCL11B	Obesity
BCL2	Obesity
BCL2A1	Obesity
	Diabetes
BCL2L14	Sleep Disorders
BCL2L15	Obesity
BCL2L2	Obesity
BCL6	Obesity
BCL7B	Obesity
BDKRB1	Diabetes
BDKRB2	Obesity
	Diabetes
BDNF	Obesity
	Diabetes
	Sleep Disorders
BDNF-AS1	Obesity
BDYWT	Obesity
BECN1	Diabetes
BEST1	Obesity
BGLAP	Obesity
	Diabetes
BHMT	Obesity
	Diabetes
BHMT2	Obesity
	Diabetes
BLACE	Obesity
BLK	Obesity
BMP2	Obesity
	Diabetes
	Sleep Disorders
BMP4	Diabetes
BMP7	Obesity
	Diabetes
	Sleep Disorders
BMPR1A	Obesity
BMPR2	Obesity
BNIP2	Sleep Disorders
BPI	Obesity
BRAF	Obesity
BRAP	Obesity
	Diabetes
BRCA1	Obesity
	Sleep Disorders
BRCA2	Obesity
	Diabetes
	Sleep Disorders
BRSK1	Obesity
BSCL2	Obesity
BST1	Sleep Disorders
BTBD9	Sleep Disorders
BTC	Obesity
	Diabetes
BTF3P11	Diabetes
BTG4	Diabetes
BTLA	Diabetes
BTN1A1	Obesity
BTN2A1	Diabetes
BTNL2	Obesity
	Diabetes
BTRC	Diabetes
BUD13	Obesity
	Diabetes
BZRAP1	Diabetes
C10ORF107	Obesity
	Diabetes
C10ORF112	Diabetes
C10ORF2	Diabetes
C10ORF32	Obesity
C11ORF10	Obesity
C11ORF9	Diabetes
C12ORF35	Diabetes
C12ORF39	Obesity
C12ORF43	Obesity
C12ORF51	Diabetes
C14ORF145	Obesity
C15ORF2	Obesity
C16ORF62	Obesity
C17ORF81	Obesity
C18ORF1	Obesity
C19ORF80	Obesity
	Diabetes
C1ORF167	Diabetes
C1QL1	Obesity
C1QTNF5	Diabetes
C2	Obesity
	Diabetes
C20ORF181	Diabetes
C21ORF59	Diabetes
C2CD4A	Obesity
C2CD4B	Obesity
C2ORF16	Obesity
	Diabetes
C2ORF47	Diabetes
C3	Obesity
	Diabetes
C4B	Obesity
C4BPA	Obesity
C4ORF32	Obesity
C5	Obesity
	Diabetes
C5AR1	Obesity
C5ORF30	Diabetes
C5ORF41	Obesity
	Diabetes
C6	Obesity
C6ORF10	Obesity
	Diabetes
C6ORF105	Obesity
	Diabetes
C6ORF106	Obesity
C6ORF15	Obesity
C6ORF217	Diabetes
C6ORF25	Obesity
C6ORF27	Obesity
C6ORF47	Obesity
C7ORF49	Obesity
C9ORF3	Obesity
	Diabetes
C9ORF46	Obesity
C9ORF7	Diabetes
C9ORF93	Obesity
CA1	Diabetes
CA10	Obesity
CAB39	Obesity
CACNA1A	Obesity
	Sleep Disorders
CACNA1B	Obesity
CACNA1C	Sleep Disorders
CACNA1D	Obesity
	Diabetes
CACNA1G	Diabetes
CACNA1H	Diabetes
CACNA2D3	Obesity
CACNB2	Obesity
	Sleep Disorders
CAD	Obesity
	Sleep Disorders
CADM1	Obesity
	Sleep Disorders
CADM2	Obesity
CALCR	Obesity
CALCRL	Obesity
CALD1	Obesity
CALM2	Obesity
CALM3	Obesity
CAMK1D	Obesity
	Diabetes
	Sleep Disorders
CAMK2N1	Diabetes
CAMK4	Sleep Disorders
CAMTA1	Obesity
	Diabetes
CANT1	Diabetes
CAP1	Diabetes
CAPN10	Obesity
	Diabetes
	Sleep Disorders
CAPN13	Obesity
CAPN5	Obesity
	Diabetes
CARD9	Obesity
CARS	Diabetes
CARTPT	Obesity
	Diabetes
CASP8	Obesity
	Diabetes
	Sleep Disorders
CASP9	Diabetes
CASR	Obesity
	Diabetes
CAT	Obesity
	Diabetes
CAV1	Obesity
	Diabetes
	Sleep Disorders
CAV2	Diabetes
CBARA1	Obesity
CBL	Obesity
	Diabetes
CBLN4	Obesity
CBS	Obesity
	Diabetes
CBX4	Diabetes
CBX5	Obesity
	Diabetes
CBX8	Diabetes
CBY1	Obesity
CCDC13	Diabetes
CCDC57	Obesity
CCDC63	Diabetes
CCHCR1	Obesity
	Diabetes
CCK	Obesity
	Diabetes
	Sleep Disorders
CCKAR	Obesity
	Sleep Disorders
CCL11	Obesity
	Diabetes
	Sleep Disorders
CCL17	Obesity
	Diabetes
CCL2	Obesity
	Diabetes
	Sleep Disorders
CCL20	Obesity
	Diabetes
CCL22	Obesity
	Diabetes
CCL3	Obesity
CCL4	Obesity
CCL4L1	Diabetes
CCL5	Obesity
	Diabetes
CCL7	Obesity
CCND1	Obesity
CCND2	Sleep Disorders
CCNG2	Sleep Disorders
CCNL1	Obesity
	Diabetes
CCR1	Sleep Disorders
CCR2	Obesity
	Diabetes
CCR3	Obesity
	Sleep Disorders
CCR5	Obesity
	Diabetes
CCR6	Obesity
CCR7	Obesity
CCR9	Obesity
CCRL2	Sleep Disorders
CCRN4L	Obesity
CCT	Obesity
CCT3	Diabetes
CD14	Obesity
	Diabetes
	Sleep Disorders
CD163	Obesity
CD19	Sleep Disorders
CD209	Diabetes
CD226	Diabetes
CD274	Diabetes
	Sleep Disorders
CD28	Diabetes
CD33	Obesity
CD34	Diabetes
CD36	Obesity
	Diabetes
CD38	Diabetes
CD4	Obesity
	Diabetes
	Sleep Disorders
CD40	Obesity
	Diabetes
CD40LG	Obesity
	Diabetes
CD44	Diabetes
CD48	Diabetes
CD55	Diabetes
CD59	Obesity
	Diabetes
CD79A	Diabetes
CD81	Obesity
CD8A	Sleep Disorders
CDC123	Obesity
	Diabetes
CDC42	Obesity
CDCA3	Diabetes
CDH1	Obesity
CDH11	Obesity
CDH12	Obesity
CDH13	Obesity
	Diabetes
CDH22	Diabetes
CDK4	Obesity
	Diabetes
CDK5	Obesity
	Diabetes
CDK5RAP1	Sleep Disorders
CDKAL1	Obesity
	Diabetes
CDKN1C	Diabetes
CDKN2A	Obesity
	Diabetes
CDKN2B	Obesity
	Diabetes
	Sleep Disorders
CDKN2B-AS1	Obesity
	Diabetes
CDKN3	Sleep Disorders
CDR1	Diabetes
CDX2	Obesity
	Diabetes
CEACAM3	Obesity
CEBPA	Obesity
	Diabetes
CEBPB	Obesity
CEBPD	Obesity
CEL	Diabetes
CELF1	Obesity
CELF2	Sleep Disorders
CELF4	Obesity
CELIAC6	Sleep Disorders
CELSR1	Diabetes
CELSR2	Obesity
	Diabetes
CEP120	Obesity
CEP135	Diabetes
CERKL	Sleep Disorders
CES1	Obesity
CES2	Obesity
CETP	Obesity
	Diabetes
CFB	Obesity
	Diabetes
CFD	Obesity
CFH	Obesity
	Diabetes
CFHR1	Diabetes
CFTR	Obesity
	Diabetes
CGA	Obesity
CGB5	Obesity
CGI-148P	Sleep Disorders
CGRRF1	Sleep Disorders
CHAC1	Obesity
CHCHD5	Obesity
CHCHD9	Obesity
CHDH	Obesity
CHES1L1	Sleep Disorders
CHGA	Diabetes
CHI3L1	Obesity
CHKB	Sleep Disorders
CHM	Sleep Disorders
CHMP4A	Obesity
CHN2	Diabetes
CHP	Diabetes
CHRM3	Obesity
CHRNA2	Obesity
CHRNA3	Obesity
CHRNA4	Obesity
CHRNA5	Obesity
	Sleep Disorders
CHRNA6	Obesity
CHRNB2	Obesity
	Sleep Disorders
CHRNB3	Obesity
CHRNB4	Obesity
CHST11	Obesity
CHST2	Sleep Disorders
CHST8	Obesity
CHUK	Obesity
	Diabetes
CHURC1	Obesity
CIDEA	Obesity
CIDEC	Diabetes
CIITA	Sleep Disorders
CILP2	Obesity
	Diabetes
CIMT	Obesity
	Diabetes
CISD2	Diabetes
CISH	Obesity
	Diabetes
CITED2	Obesity
CLCA1	Diabetes
CLCC1	Diabetes
CLCN6	Diabetes
CLEC16A	Diabetes
CLIC1	Obesity
CLIP1	Obesity
CLN3	Obesity
CLOCK	Obesity
	Diabetes
	Sleep Disorders
CLPS	Obesity
	Diabetes
CLU	Obesity
	Diabetes
CMIP	Obesity
	Diabetes
CMKLR1	Obesity
CMTM7	Obesity
CNBP	Obesity
	Diabetes
CNDP1	Obesity
	Diabetes
CNDP2	Obesity
CNIH2	Diabetes
CNKSR3	Diabetes
CNNM2	Obesity
CNPY1	Obesity
CNPY2	Obesity
CNR1	Obesity
	Diabetes
CNR2	Obesity
	Diabetes
CNTF	Obesity
CNTNAP2	Obesity
	Diabetes
COBLL1	Obesity
	Diabetes
COG2	Obesity
	Diabetes
	Sleep Disorders
COG6	Diabetes
COL13A1	Diabetes
COL15A1	Obesity
COL17A1	Diabetes
COL18A1	Obesity
COL1A1	Diabetes
COL21A1	Obesity
COL2A1	Obesity
COL3A1	Diabetes
COL4A1	Obesity
	Diabetes
COL4A2	Diabetes
COL4A3	Obesity
	Sleep Disorders
COL5A2	Obesity
COL6A1	Diabetes
COL6A5	Obesity
COL7A1	Obesity
COL8A1	Diabetes
COL9A2	Obesity
COL9A3	Obesity
COMMD5	Diabetes
COMT	Obesity
	Diabetes
	Sleep Disorders
CORIN	Obesity
	Diabetes
COX1	Diabetes
COX18	Obesity
COX2	Diabetes
COX8A	Obesity
	Diabetes
CP	Obesity
	Diabetes
CPA6	Diabetes
CPB2	Diabetes
CPE	Obesity
CPEB4	Obesity
CPNE5	Obesity
CPPED1	Obesity
CPS1	Obesity
CPT1A	Obesity
	Diabetes
CPT1B	Obesity
	Sleep Disorders
CPT2	Obesity
CPVL	Diabetes
CRABP2	Diabetes
CRADD	Sleep Disorders
CRAT	Sleep Disorders
CRB1	Obesity
CREB1	Obesity
	Diabetes
CREB3	Obesity
CREM	Diabetes
CRH	Obesity
CRHBP	Obesity
	Diabetes
CRHR1	Obesity
CRHR2	Obesity
CRK	Obesity
CRP	Obesity
	Diabetes
	Sleep Disorders
CRPP1	Obesity
CRTC1	Obesity
CRTC3	Obesity
CRY1	Obesity
	Sleep Disorders
CRY2	Obesity
	Diabetes
	Sleep Disorders
CRYBA2	Diabetes
CRYGFP	Obesity
	Diabetes
CSDC2	Obesity
CSF2	Obesity
CSF3	Obesity
	Diabetes
CSK	Obesity
CSMD1	Obesity
CSMD3	Obesity
CSNK1D	Obesity
	Sleep Disorders
CSNK1E	Sleep Disorders
CSNK2A2	Diabetes
CST3	Obesity
	Diabetes
	Sleep Disorders
CST4	Diabetes
CSTA	Obesity
CTBP2	Obesity
	Diabetes
CTCF	Obesity
	Diabetes
CTF1	Obesity
CTGF	Obesity
	Diabetes
CTH	Obesity
	Diabetes
CTHRC1	Obesity
CTLA4	Obesity
	Diabetes
	Sleep Disorders
CTNNA3	Obesity
	Diabetes
CTNNAL1	Sleep Disorders
CTNNB1	Obesity
CTNNBL1	Obesity
CTRC	Diabetes
CTRL	Obesity
CTSG	Diabetes
CTSH	Sleep Disorders
CTSS	Obesity
CTSZ	Obesity
CUBN	Diabetes
CUX1	Obesity
CUX2	Obesity
	Diabetes
CWF19L2	Sleep Disorders
CX3CR1	Obesity
	Diabetes
CXADR	Obesity
CXCL10	Obesity
	Diabetes
CXCL11	Obesity
CXCL12	Obesity
	Diabetes
CXCL5	Diabetes
CXCL9	Obesity
CXCR1	Obesity
CXCR4	Obesity
	Diabetes
CXCR7	Obesity
CYB5A	Obesity
CYB5R4	Obesity
	Diabetes
CYBA	Obesity
	Diabetes
	Sleep Disorders
CYBB	Diabetes
CYLC2	Sleep Disorders
CYP11A1	Obesity
CYP11B1	Obesity
CYP11B2	Obesity
	Diabetes
CYP17A1	Obesity
	Diabetes
	Sleep Disorders
CYP19A1	Obesity
	Diabetes
CYP1A1	Obesity
	Diabetes
CYP1A2	Obesity
	Diabetes
	Sleep Disorders
CYP1B1	Obesity
	Diabetes
CYP21A2	Obesity
CYP24A1	Obesity
	Diabetes
CYP27A1	Obesity
	Diabetes
CYP27B1	Obesity
	Diabetes
CYP2A5	Obesity
CYP2A6	Obesity
	Sleep Disorders
CYP2B6	Obesity
	Diabetes
	Sleep Disorders
CYP2C19	Obesity
	Diabetes
CYP2C8	Obesity
	Diabetes
CYP2C9	Obesity
	Diabetes
CYP2D6	Obesity
	Diabetes
	Sleep Disorders
CYP2E1	Obesity
	Diabetes
CYP2J2	Obesity
	Diabetes
CYP2R1	Obesity
	Diabetes
CYP2W1	Obesity
CYP3A4	Obesity
	Diabetes
	Sleep Disorders
CYP3A5	Obesity
	Diabetes
	Sleep Disorders
CYP3A5P1	Obesity
CYP46A1	Obesity
	Diabetes
CYP4A11	Diabetes
CYP4F11	Obesity
CYP4F12	Diabetes
CYP4F2	Diabetes
CYP4F3	Diabetes
CYP51A1	Obesity
CYP7A1	Obesity
	Diabetes
CYP7B1	Obesity
CYTB	Obesity
	Diabetes
DAB1	Obesity
DAB2IP	Obesity
DACH1	Obesity
	Diabetes
DAD1	Sleep Disorders
DAPK1	Sleep Disorders
DARC	Obesity
DARS2	Diabetes
DBH	Obesity
	Diabetes
	Sleep Disorders
DBP	Obesity
	Diabetes
	Sleep Disorders
DCC	Sleep Disorders
DCD	Obesity
	Diabetes
DCDC5	Obesity
DCHS2	Diabetes
DCLK3	Obesity
DDAH1	Obesity
	Diabetes
DDAH2	Obesity
	Diabetes
DDIT3	Diabetes
DDX5	Obesity
DDX60L	Obesity
DEFB1	Diabetes
DEFB126	Obesity
DEGS2	Sleep Disorders
DENND1A	Obesity
DENND1B	Obesity
DEPTOR	Obesity
DET1	Sleep Disorders
DGAT1	Obesity
DGAT2	Obesity
DGKB	Obesity
	Diabetes
	Sleep Disorders
DGKG	Obesity
DHCR7	Obesity
	Diabetes
DHFR	Obesity
DIANPH	Diabetes
DICER1	Diabetes
DIO1	Diabetes
DIO2	Obesity
	Diabetes
DIO3	Diabetes
DIP2C	Obesity
DKK1	Diabetes
DLC1	Diabetes
DLD	Obesity
DLEU7	Diabetes
DLK1	Obesity
DLL1	Diabetes
DMPK	Diabetes
DNAH8	Diabetes
DNAJB13	Sleep Disorders
DNAJB6	Obesity
DNAJC19	Obesity
DNAJC27	Obesity
DNASE1	Obesity
DNER	Diabetes
DNM3	Obesity
DNMT1	Obesity
	Sleep Disorders
DNMT3A	Obesity
DNMT3B	Obesity
DNTTIP2	Diabetes
DOC2A	Sleep Disorders
DOCK1	Diabetes
DOCK3	Diabetes
DOCK5	Obesity
DOK5	Obesity
DPEP1	Diabetes
DPP10	Obesity
DPP4	Obesity
	Diabetes
DPP6	Diabetes
DRAM1	Obesity
DRD1	Diabetes
	Sleep Disorders
DRD2	Obesity
	Diabetes
	Sleep Disorders
DRD3	Obesity
	Diabetes
	Sleep Disorders
DRD4	Obesity
	Sleep Disorders
DRG1	Obesity
DROSHA	Diabetes
DUOX2	Diabetes
DUSP1	Obesity
DUSP12	Diabetes
DUSP9	Obesity
	Diabetes
DYNC1H1	Diabetes
	Sleep Disorders
E2F1	Diabetes
EBF1	Obesity
EBI3	Obesity
ECE1	Obesity
	Sleep Disorders
EDIL3	Obesity
EDN1	Obesity
	Diabetes
	Sleep Disorders
EDN2	Obesity
	Sleep Disorders
EDN3	Obesity
	Sleep Disorders
EDNRA	Obesity
	Diabetes
	Sleep Disorders
EDNRB	Obesity
	Diabetes
	Sleep Disorders
EEF1A1P11	Diabetes
EFCAB4B	Diabetes
EFEMP1	Obesity
	Diabetes
EFTUD1	Diabetes
EGF	Sleep Disorders
EGFL8	Obesity
EGFR	Obesity
	Diabetes
	Sleep Disorders
EGR2	Obesity
EGR3	Obesity
EHD3	Sleep Disorders
EHMT1	Diabetes
EIF2AK3	Diabetes
EIF2AK4	Obesity
EIF2B4	Obesity
EIF2S1	Obesity
EIF3G	Sleep Disorders
EIF3L	Diabetes
EIF4EBP1	Obesity
ELMO1	Diabetes
ELMO2	Diabetes
ELMOD1	Sleep Disorders
ELN	Diabetes
ELOVL2	Obesity
ELOVL3	Obesity
ELOVL5	Obesity
ELOVL6	Diabetes
ELP3	Obesity
ELP4	Obesity
EMX2	Diabetes
EN2	Obesity
ENG	Obesity
ENPEP	Obesity
	Diabetes
ENPP1	Obesity
	Diabetes
ENTPD6	Obesity
EP300	Diabetes
EPAS1	Obesity
EPCAM	Diabetes
EPHA6	Obesity
EPHX1	Diabetes
EPHX2	Diabetes
EPO	Diabetes
EPS8	Sleep Disorders
ERAP2	Obesity
ERBB2	Obesity
	Diabetes
ERBB3	Diabetes
ERBB4	Obesity
	Diabetes
ERCC1	Obesity
	Diabetes
ERCC2	Obesity
	Diabetes
ERCC4	Obesity
ERCC6	Diabetes
ERRFI1	Diabetes
ERVK7	Diabetes
ESR1	Obesity
	Diabetes
ESR2	Obesity
	Diabetes
ESRRA	Obesity
ESRRG	Obesity
ESYT2	Obesity
ESYT3	Obesity
ETS2	Obesity
ETV3	Obesity
	Diabetes
	Sleep Disorders
ETV5	Obesity
ETV6	Diabetes
EXOC4	Obesity
EXOSC4	Obesity
	Diabetes
EXT2	Obesity
	Diabetes
EZH2	Obesity
F11R	Obesity
F12	Diabetes
F13A1	Obesity
	Diabetes
F13B	Diabetes
F2	Obesity
	Diabetes
F2RL1	Obesity
F3	Obesity
	Diabetes
F5	Obesity
	Diabetes
F7	Obesity
	Diabetes
F9	Obesity
FAAH	Obesity
	Diabetes
FABP1	Obesity
	Diabetes
FABP2	Obesity
	Diabetes
FABP3	Obesity
	Diabetes
	Sleep Disorders
FABP4	Obesity
	Diabetes
	Sleep Disorders
FABP5	Obesity
	Diabetes
FADS1	Obesity
	Diabetes
FADS2	Obesity
	Diabetes
FADS3	Obesity
	Diabetes
FAF1	Diabetes
FAHD2A	Obesity
FAIM2	Obesity
	Diabetes
FAM120AOS	Obesity
FAM13A	Diabetes
FAM155A	Diabetes
FAM160A1	Diabetes
FAM163B	Diabetes
FAM170B	Diabetes
FAM205A	Diabetes
FAM3C	Obesity
FAM3D	Sleep Disorders
FAM50B	Obesity
FAM54A	Obesity
FAM60A	Obesity
FAM71F1	Obesity
FAM78B	Diabetes
FAM9B	Obesity
FANCA	Obesity
	Diabetes
FANCL	Obesity
FARS2	Diabetes
FAS	Obesity
	Diabetes
FASLG	Diabetes
FASN	Obesity
FAT1	Obesity
FBF1	Diabetes
FBLN5	Diabetes
FBN2	Diabetes
FBN3	Obesity
	Diabetes
FCGR2A	Diabetes
FCGR3B	Diabetes
FCP1	Diabetes
FDFT1	Obesity
	Diabetes
FECH	Sleep Disorders
FEM1A	Diabetes
FEM1B	Diabetes
FER1L4	Obesity
FERMT2	Obesity
FFAR3	Obesity
FGA	Obesity
	Diabetes
FGB	Obesity
	Diabetes
FGF2	Obesity
	Diabetes
	Sleep Disorders
FGF21	Obesity
	Diabetes
FGF23	Diabetes
FGF5	Obesity
FGFBP1	Sleep Disorders
FGFR1	Obesity
	Sleep Disorders
FGFR2	Obesity
	Diabetes
	Sleep Disorders
FGFR3	Obesity
	Sleep Disorders
FGG	Obesity
	Diabetes
FGL1	Obesity
FH	Obesity
	Sleep Disorders
FHIT	Obesity
FHL5	Obesity
FIGF	Obesity
FKBP5	Obesity
FLJ33534	Obesity
FLJ42280	Obesity
FLRT2	Obesity
FLT1	Diabetes
	Sleep Disorders
FMO3	Obesity
FMR1	Sleep Disorders
FN1	Diabetes
FN3K	Diabetes
FN3KRP	Obesity
FNDC5	Obesity
	Diabetes
FOLH1	Diabetes
FOXA1	Diabetes
FOXA2	Obesity
FOXA3	Obesity
FOXC1	Diabetes
FOXC2	Obesity
	Diabetes
FOXD3	Diabetes
FOXE1	Obesity
FOXF1	Obesity
FOXL1	Obesity
FOXN3	Diabetes
FOXO1	Obesity
	Diabetes
FOXO1A	Obesity
FOXO3	Obesity
	Diabetes
	Sleep Disorders
FOXO3A	Obesity
FOXO4	Obesity
FOXP1	Obesity
FOXP2	Obesity
FOXP3	Diabetes
FPGT-TNNI3K	Obesity
FPH1	Obesity
FRAS1	Obesity
FREM3	Sleep Disorders
FRMD3	Diabetes
FSD2	Diabetes
FSHB	Obesity
FSHR	Obesity
FSTL4	Obesity
FTO	Obesity
	Diabetes
	Sleep Disorders
FURIN	Obesity
	Diabetes
FUS	Obesity
FUT2	Diabetes
FUT3	Obesity
	Diabetes
FUT6	Obesity
	Diabetes
FYN	Diabetes
G2E3	Obesity
G6PC	Obesity
	Diabetes
G6PC2	Obesity
	Diabetes
G6PD	Obesity
	Diabetes
GAB1	Sleep Disorders
GABARAP	Obesity
GABBR1	Obesity
	Sleep Disorders
GABPB1	Obesity
	Diabetes
GABRA2	Obesity
GABRA4	Sleep Disorders
GABRA6	Obesity
GABRB3	Diabetes
	Sleep Disorders
GABRE	Sleep Disorders
GABRQ	Sleep Disorders
GABRR1	Sleep Disorders
GABRR2	Sleep Disorders
GABRR3	Sleep Disorders
GAD1	Diabetes
GAD2	Obesity
	Diabetes
GAL	Obesity
GALNT10	Obesity
GALNT2	Obesity
GALR1	Obesity
GALR3	Sleep Disorders
GAP43	Diabetes
GAPDHS	Diabetes
GAS2	Sleep Disorders
GAS6	Obesity
	Diabetes
GAST	Obesity
GATA2	Obesity
	Diabetes
GATA3	Diabetes
GATA4	Obesity
	Diabetes
GBA	Sleep Disorders
GBE1	Obesity
GC	Obesity
	Diabetes
GCG	Obesity
	Diabetes
GCGR	Obesity
GCH1	Diabetes
GCK	Obesity
	Diabetes
GCKR	Obesity
	Diabetes
GCLC	Obesity
GDAP1	Obesity
GDF15	Diabetes
GDF5	Obesity
GDF7	Sleep Disorders
GDNF	Obesity
	Sleep Disorders
GDPD4	Obesity
GEN1	Diabetes
GFER	Obesity
GFOD2	Obesity
GFPT1	Obesity
GFPT2	Diabetes
GFRA1	Diabetes
GGA3	Obesity
	Diabetes
GGCT	Diabetes
GGH	Obesity
GGT1	Obesity
	Diabetes
	Sleep Disorders
GGTLC5P	Obesity
	Diabetes
GH1	Obesity
	Diabetes
	Sleep Disorders
GHR	Obesity
	Diabetes
	Sleep Disorders
GHRL	Obesity
	Diabetes
GHSR	Obesity
	Diabetes
GIP	Obesity
	Diabetes
GIPR	Obesity
	Diabetes
GIT1	Sleep Disorders
GJA4	Obesity
	Diabetes
GLA	Obesity
GLI2	Obesity
GLIPR1	Obesity
GLIS3	Obesity
	Diabetes
GLO1	Diabetes
	Sleep Disorders
GLP1R	Obesity
	Diabetes
GLUD1	Diabetes
GLUL	Diabetes
GLYAT	Diabetes
GNAQ	Obesity
GNAS	Obesity
	Diabetes
GNAS-AS1	Diabetes
GNAT2	Obesity
GNAT3	Obesity
GNB3	Obesity
	Diabetes
	Sleep Disorders
GNGT2	Obesity
GNL3	Obesity
GNMT	Obesity
GNPDA1	Obesity
GNPDA2	Obesity
	Diabetes
GNRH1	Obesity
GORASP2	Diabetes
GOT1	Obesity
GP1BA	Obesity
	Diabetes
GP2	Obesity
GPAM	Obesity
	Diabetes
GPBAR1	Diabetes
GPC5	Obesity
GPD2	Obesity
	Diabetes
GPHA2	Diabetes
GPI	Obesity
	Diabetes
GPLD1	Obesity
GPR120	Sleep Disorders
GPR125	Sleep Disorders
GPR126	Sleep Disorders
GPR132	Diabetes
GPR156	Sleep Disorders
GPR158	Obesity
GPR162	Obesity
GPR176	Sleep Disorders
GPR39	Obesity
GPR42	Obesity
GPR45	Diabetes
GPR50	Obesity
GPR6	Sleep Disorders
GPR61	Obesity
GPR77	Diabetes
GPRC5B	Obesity
GPSM1	Diabetes
GPT	Obesity
	Diabetes
GPX1	Obesity
	Diabetes
GPX3	Obesity
	Diabetes
GPX4	Obesity
	Diabetes
GPX5	Obesity
GPX6	Obesity
GPX7	Obesity
	Diabetes
GRB10	Diabetes
GRB14	Obesity
	Diabetes
GRB2	Diabetes
GREM1	Diabetes
GRIA1	Diabetes
GRIA3	Obesity
	Diabetes
GRID1	Obesity
GRIK1	Diabetes
GRIK2	Diabetes
GRIK3	Diabetes
GRIN1	Obesity
	Diabetes
GRIN2A	Sleep Disorders
GRIN2B	Diabetes
GRK4	Diabetes
GRK5	Obesity
	Diabetes
	Sleep Disorders
GRLF1	Obesity
GRM3	Diabetes
GRN	Obesity
GRXCR1	Obesity
GSDMB	Obesity
GSK3B	Obesity
	Diabetes
	Sleep Disorders
GSS	Obesity
GSTA1	Obesity
	Diabetes
GSTA2	Obesity
GSTA3	Obesity
GSTA4	Obesity
GSTK1	Obesity
	Diabetes
GSTM1	Obesity
	Diabetes
GSTM2	Diabetes
GSTO1	Obesity
GSTO2	Obesity
GSTP1	Obesity
	Diabetes
GSTT1	Obesity
	Diabetes
GSTT2	Obesity
GTF2H1	Sleep Disorders
GTF3A	Obesity
GTF3C5	Diabetes
GTPBP3	Diabetes
GUCY1A3	Diabetes
	Sleep Disorders
GUCY1B3	Sleep Disorders
GUCY2C	Diabetes
GYG2	Obesity
GYPA	Obesity
GYS1	Diabetes
GYS2	Obesity
	Diabetes
GZMH	Obesity
H19	Obesity
H6PD	Obesity
HABP2	Obesity
	Diabetes
HADH	Diabetes
HADHA	Obesity
HAL	Diabetes
HAP1	Diabetes
HAUS1	Obesity
HAVCR1	Obesity
HBA1	Obesity
	Diabetes
HBB	Obesity
	Diabetes
HBHR	Diabetes
HBQ1	Obesity
HCAR2	Obesity
HCC	Obesity
	Diabetes
HCRT	Obesity
	Sleep Disorders
HCRTR1	Obesity
	Sleep Disorders
HCRTR2	Obesity
	Sleep Disorders
HDAC1	Obesity
	Diabetes
HDAC3	Diabetes
HDAC5	Obesity
HDAC9	Obesity
	Diabetes
HDLBP	Diabetes
HEBP1	Obesity
HERPUD1	Obesity
	Diabetes
HERPUD2	Diabetes
HFE	Obesity
	Diabetes
	Sleep Disorders
HGF	Obesity
	Diabetes
HHEX	Obesity
	Diabetes
HHIP	Obesity
	Diabetes
HHIPL2	Diabetes
HIF1A	Obesity
	Diabetes
	Sleep Disorders
HIF1AN	Obesity
	Diabetes
HIF3A	Obesity
HIP1	Obesity
HIPK3	Sleep Disorders
HIST1H1PS2	Obesity
HIVEP1	Obesity
HK1	Obesity
	Diabetes
	Sleep Disorders
HKDC1	Diabetes
HLA-A	Obesity
	Diabetes
	Sleep Disorders
HLA-B	Obesity
	Diabetes
	Sleep Disorders
HLA-C	Obesity
	Diabetes
	Sleep Disorders
HLA-DMA	Diabetes
HLA-DPA1	Obesity
	Diabetes
	Sleep Disorders
HLA-DPB1	Obesity
	Diabetes
	Sleep Disorders
HLA-DQA1	Obesity
	Diabetes
	Sleep Disorders
HLA-DQA2	Obesity
	Sleep Disorders
HLA-DQB1	Obesity
	Diabetes
	Sleep Disorders
HLA-DRA	Obesity
	Diabetes
HLA-DRB1	Obesity
	Diabetes
	Sleep Disorders
HLA-DRB2	Diabetes
HLA-DRB3	Diabetes
	Sleep Disorders
HLA-DRB4	Diabetes
	Sleep Disorders
HLA-DRB5	Obesity
	Diabetes
	Sleep Disorders
HLA-DRB6	Diabetes
HLA-DRB9	Diabetes
HLA-G	Obesity
	Diabetes
HLA-J	Obesity
HLN2	Obesity
	Diabetes
HMCN1	Diabetes
HMG20A	Obesity
	Diabetes
HMGA1	Obesity
	Diabetes
HMGA2	Obesity
HMGCR	Obesity
	Diabetes
	Sleep Disorders
HMGCS1	Obesity
HMGCS2	Obesity
	Diabetes
HMOX1	Obesity
	Diabetes
	Sleep Disorders
HMX3	Diabetes
HNF1A	Obesity
	Diabetes
HNF1A-AS1	Obesity
HNF1B	Obesity
	Diabetes
HNF4A	Obesity
	Diabetes
HNF4G	Obesity
HNMT	Sleep Disorders
HNRNPK	Obesity
HORMAD1	Obesity
HOXB5	Obesity
HOXC12	Obesity
HOXC13	Obesity
HOXC8	Obesity
HP	Obesity
	Diabetes
	Sleep Disorders
HPCAL1	Diabetes
HPGDS	Obesity
HPSE	Obesity
	Diabetes
HRH1	Obesity
HS6ST3	Obesity
HSD11B1	Obesity
	Diabetes
HSD11B2	Diabetes
HSD17B1	Obesity
	Diabetes
HSD17B12	Obesity
	Sleep Disorders
HSD17B13	Diabetes
HSD17B3	Sleep Disorders
HSD3B1	Obesity
	Diabetes
HSD3B2	Obesity
HSP90B2P	Obesity
HSPA1A	Diabetes
HSPA1B	Obesity
	Diabetes
HSPA1L	Obesity
	Diabetes
HSPA2	Obesity
	Diabetes
HSPA4	Diabetes
HSPA5	Diabetes
HSPA8	Obesity
HSPB7	Obesity
	Sleep Disorders
HSPD1	Obesity
HSPG2	Diabetes
HTR1A	Obesity
HTR1B	Obesity
	Sleep Disorders
HTR1D	Obesity
HTR2A	Obesity
	Diabetes
	Sleep Disorders
HTR2B	Obesity
	Diabetes
HTR2C	Obesity
	Diabetes
	Sleep Disorders
HTR3A	Obesity
	Sleep Disorders
HTR3B	Obesity
	Sleep Disorders
HTR3C	Obesity
	Sleep Disorders
HTR3D	Obesity
	Sleep Disorders
HTR3E	Obesity
	Sleep Disorders
HTR5A	Obesity
HTR6	Obesity
HTRA1	Obesity
	Diabetes
HTT	Obesity
	Diabetes
HYMAI	Diabetes
HYOU1	Obesity
IAPP	Diabetes
IARS	Obesity
IARS2	Obesity
	Diabetes
ICAM1	Obesity
	Diabetes
	Sleep Disorders
ICAM3	Diabetes
ICAM4	Diabetes
ICOSLG	Sleep Disorders
ID3	Obesity
	Diabetes
IDAS	Diabetes
IDDM12	Diabetes
IDDM3	Diabetes
IDDM4	Diabetes
IDDM5	Diabetes
IDDM8	Diabetes
IDE	Obesity
	Diabetes
IDI1	Obesity
IFI30	Obesity
IFIH1	Diabetes
IFNA2	Obesity
IFNA21	Sleep Disorders
IFNA7	Obesity
IFNAR1	Sleep Disorders
IFNB1	Diabetes
IFNG	Obesity
	Diabetes
	Sleep Disorders
IFNGR1	Obesity
	Diabetes
	Sleep Disorders
IFNGR2	Diabetes
IFNL4	Obesity
	Diabetes
IFNW1	Sleep Disorders
IGBP1	Sleep Disorders
IGF1	Obesity
	Diabetes
IGF1R	Obesity
	Diabetes
IGF2	Obesity
	Diabetes
IGF2AS	Diabetes
IGF2BP1	Obesity
IGF2BP2	Obesity
	Diabetes
IGF2BP3	Obesity
IGF2R	Obesity
	Diabetes
IGFBP1	Obesity
	Diabetes
IGFBP2	Obesity
	Diabetes
IGFBP3	Obesity
	Diabetes
	Sleep Disorders
IGFBP4	Obesity
IGFBP7	Diabetes
IGFL2	Diabetes
IGHD1-14	Obesity
	Diabetes
IGHD1-7	Diabetes
IGHVIII-38-1	Obesity
IGKV1D-27	Sleep Disorders
IGKV2D-28	Obesity
IGLL3P	Obesity
IGLV5-45	Obesity
IGSF21	Diabetes
IK	Sleep Disorders
IKBKG	Obesity
	Diabetes
IKZF1	Diabetes
IKZF3	Diabetes
IL10	Obesity
	Diabetes
	Sleep Disorders
IL10RA	Obesity
	Diabetes
IL10RB	Diabetes
	Sleep Disorders
IL12A	Diabetes
IL12B	Diabetes
IL12RB1	Obesity
IL12RB2	Diabetes
IL13	Obesity
	Diabetes
	Sleep Disorders
IL15	Obesity
	Diabetes
IL15RA	Diabetes
IL16	Obesity
	Diabetes
IL17A	Obesity
	Diabetes
	Sleep Disorders
IL17F	Obesity
	Diabetes
IL17RA	Diabetes
IL17RB	Diabetes
IL17RE	Diabetes
IL18	Obesity
	Diabetes
IL18R1	Obesity
	Sleep Disorders
IL18RAP	Obesity
IL1A	Obesity
	Diabetes
	Sleep Disorders
IL1B	Obesity
	Diabetes
	Sleep Disorders
IL1R1	Obesity
	Diabetes
IL1R2	Obesity
	Diabetes
	Sleep Disorders
IL1RAP	Obesity
IL1RL1	Obesity
IL1RN	Obesity
	Diabetes
IL2	Obesity
	Diabetes
	Sleep Disorders
IL20	Obesity
	Diabetes
IL21	Diabetes
IL22	Obesity
IL23A	Diabetes
IL23R	Diabetes
IL24	Diabetes
[truncated: 2,378 more rows]
